# Supplementary material for: Preparation of Bacterial Cellulose/Ketjen Black-TiO2 Composite Separator and Its Application in Lithium-Sulfur Batteries
Source: MDPI journal article supplement (doi:10.3390/polym14245559), 2022-12-19
Supplement: s1 [file s1]

# Supplementary Materials: Preparation of Bacterial Cellulose/Ketjen Black-TiO<sub>2</sub> Composite Separator and Its Application in Lithium-Sulfur Batteries

Ming Yan, Chuanshan Zhao \* and Xia Li

State Key Laboratory of Biobased Material and Green Papermaking, Faculty of Light Industry, Qilu University of Technology (Shandong Academy of Sciences), Jinan 250353, China

\* Correspondence: ppzcs78@163.com

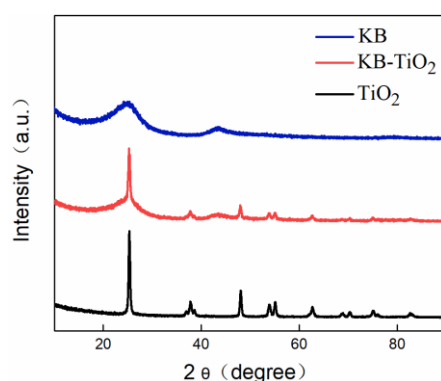

Figure S1. XRD pattern of KB-TiO<sub>2</sub> composite.

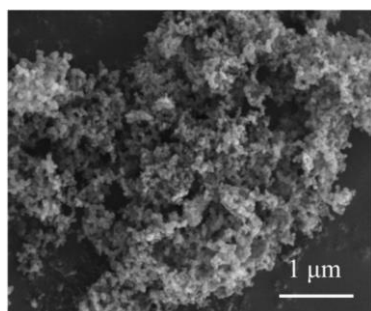

Figure S2. SEM image of KB-TiO<sub>2</sub> composite.

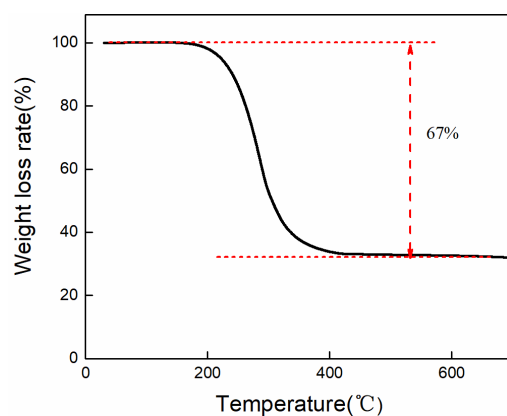

Figure S3. TGA diagram of KB/S composites.

**Table S1.** Performance comparison between batteries with BKT separator and batteries with other separators.

| Sample                                  | Sulfur surface density (mg/cm <sup>2</sup> ) | Rates | Initial capacity (mAh × g <sup>-1</sup> ) | References |
|-----------------------------------------|----------------------------------------------|-------|-------------------------------------------|------------|
| H-TiO <sub>2</sub> @rGO@PP              | 1.6                                          | 0.3C  | 1037.9                                    | Ref. [43]  |
| KB@ZIF-8/PP                             | 1.2                                          | 0.1 C | 1235.6                                    | Ref. [14]  |
| CBC/TiO <sub>2</sub> modified separator | 1.5                                          | 0.2C  | 1314                                      | Ref. [44]  |
| BKT                                     | 1.0                                          | 0.5C  | 1180                                      | This paper |
